# Supplementary material for: Repeated Antigen-Based Rapid Diagnostic Testing for Estimating the Coronavirus Disease 2019 Prevalence from the Perspective of the Workers’ Vulnerability before and during the Lockdown
Source: PubMed Central journal article supplement (PMC7915907; doi:10.3390/ijerph18041638), 2021-02-09
Supplement: ijerph-18-01638-s001.pdf [file ijerph-18-01638-s001.pdf]

**Supplementary Table S1.** Characteristics of the study population stratified by gender, Pre-lockdown screening program (N=1054)

| <b>Study Characteristics</b>                           | <b>Total<br/>(n=1054)</b> | <b>Males<br/>(n=536)</b> | <b>Females<br/>(n=517)</b> | <b>p-value</b> |
|--------------------------------------------------------|---------------------------|--------------------------|----------------------------|----------------|
| Age (years)                                            | 42±19                     | 41±20                    | 42±18                      | 0.406          |
| Medication, (yes), n (%)                               | 367 (34.8)                | 178 (33.2)               | 189 (36.6)                 | 0.151          |
| Non-smokers, n (%)                                     | 606 (57.5)                | 300 (60.0)               | 306 (59.2)                 | 0.345          |
| Current smokers, n (%)                                 | 326 (30.9)                | 161 (30.0)               | 165 (32.0)                 | 0.452          |
| Ex-smokers, n (%)                                      | 88 (8.3)                  | 57 (10.6)                | 31 (6.0)                   | 0.05           |
| Respiratory symptoms, (yes), n (%) *the last 15 days   | 238 (22.6)                | 123 (22.9)               | 115 (22.2)                 | 0.421          |
| Previous contacts with a Covid-19 positive case, n (%) | 357 (33.9)                | 171 (31.9)               | 186 (36.0)                 | 0.092          |
| Friendly Environment, n (%)                            | 112 (10.6)                | 62 (11.6)                | 50 (9.7)                   | 0.185          |
| Family Environment, n (%)                              | 90 (8.5)                  | 35 (6.5)                 | 55 (10.6)                  | 0.011          |
| Professional Environment, n (%)                        | 104 (9.9)                 | 49 (9.1)                 | 55 (10.6)                  | 0.239          |
| Leisure environment, n (%)                             | 57 (5.4)                  | 31 (5.7)                 | 26 (5.0)                   | 0.343          |
| >1 previous contacts, n (%)                            | 8 (0.7)                   | 5 (0.9)                  | 3 (0.05)                   | 0.383          |
| Travels *the last 15 days                              | 141 (13.4)                | 76 (14.2)                | 65 (12.6)                  | 0.692          |
| Previous testing, (yes)<br>(average: 2±1 tests, max=6) | 195 (18.5)                | 97 (18.1)                | 98 (19)                    | 0.390          |

**Notes:** Data are expressed as mean ± standard deviation or as frequency (percentage).

**Supplementary Table S2** Characteristics of the study population stratified by gender, Second screening program (N=462)

| Study Characteristics                                  | Total (n=462) | Males (n=240) | Females (n=221) | p-value |
|--------------------------------------------------------|---------------|---------------|-----------------|---------|
| Age (years)                                            | 48±17         | 49.4±16.4     | 46.4±17.5       | 0.05    |
| Medication, (yes), n (%)                               | 144 (31.2)    | 79 (32.9)     | 65 (29.4)       | 0.248   |
| Non-smokers, n (%)                                     | 267 (57.9)    | 136 (56.7)    | 131 (59.3)      | 0.300   |
| Current smokers, n (%)                                 | 137 (29.7)    | 67 (27.9)     | 70 (31.7)       | 0.209   |
| Ex-smokers, n (%)                                      | 58 (12.6)     | 38 (15.8)     | 20 (9.0)        | 0.02    |
| Symptoms, (yes), n (%) *the last 15 days               | 88 (19.1)     | 40 (16.6)     | 48 (21.7)       | 0.129   |
| Previous contacts with a Covid-19 positive case, n (%) | 108 (23.4)    | 43 (17.9)     | 65 (29.4)       | 0.009   |
| Friendly environment, n (%)                            | 24 (5.2)      | 9 (3.8)       | 15 (6.8)        | 0.102   |
| Family environment, n (%)                              | 63 (13.7)     | 21 (8.8)      | 42 (10.9)       | 0.001   |
| Professional environment, n (%)                        | 24 (5.2)      | 13 (5.4)      | 11 (5.0)        | 0.504   |
| Leisure environment, n (%)                             | 13 (2.8)      | 9 (3.8)       | 4 (1.8)         | 0.167   |
| >1 previous contacts, n (%)                            | 9 (2.0)       | 4 (1.7)       | 5 (2.3)         | 0.446   |
| Travels*the last 15 days                               | 14 (3.0)      | 9 (3.8)       | 5 (2.3)         | 0.259   |
| Previous testing, (yes), n (%) (average: 2±1, max=7)   | 170 (36.9)    | 94 (39.2)     | 76 (34.4)       | 0.176   |
| Previous positive tests, n (%)                         | 31/170 (18.2) | 19/94 (20.2)  | 12/76 (15.8)    | 0.295   |
| Supermarket visit, (yes), n (%)                        | 318 (68.8)    | 169 (70.4)    | 149 (67.4)      | 0.299   |
| Supermarket visits (frequency)                         | 3±2           | 4±3           | 3±2             | 0.001   |

**Notes:** Data are expressed as mean ± standard deviation or as frequency (percentage).
